# Supplementary material for: Stearic Acid and TNF-α Co-Operatively Potentiate MIP-1α Production in Monocytic Cells via MyD88 Independent TLR4/TBK/IRF3 Signaling Pathway
Source: PubMed Central journal article supplement (PMC7600458; doi:10.3390/biomedicines8100403), 2020-10-09
Supplement: biomedicines-08-00403-s001.pdf [file biomedicines-08-00403-s001.pdf]

**Fig:S1**

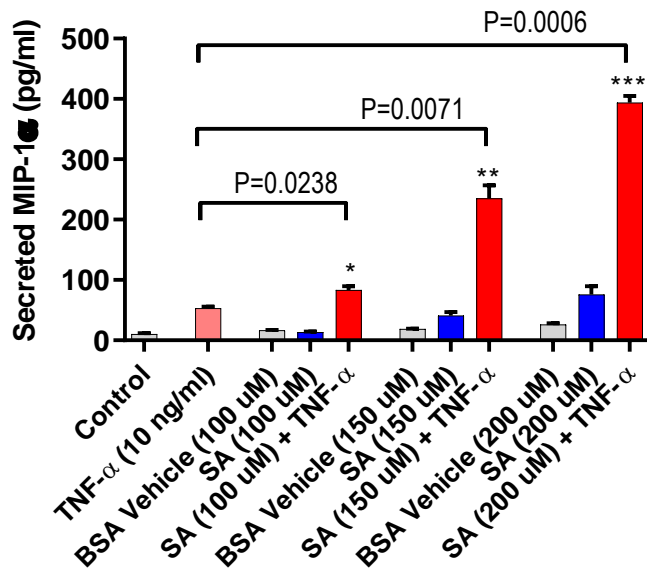

**Supplemental Figure 1: Dose dependent manner of cooperative effect of stearic acid on TNF- $\alpha$  mediated MIP-1 $\alpha$  production.** THP-1 cells were treated with different concentrations of stearic acid (100  $\mu$ M, 150  $\mu$ M, 200  $\mu$ M ) and then treated with TNF $\alpha$  (10 ng/ml) for 24 h. Culture media were collected. Secreted MIP-1 $\alpha$  protein in culture media was determined by ELISA.

**Supplemental Table 1: Characteristics of the study participants**

| Phenotype                | Lean                     | Obese                    |
|--------------------------|--------------------------|--------------------------|
|                          | (n = 10) (Mean $\pm$ SD) | (n = 18) (Mean $\pm$ SD) |
| Age (years)              | 42.7 $\pm$ 8.17          | 48.89 $\pm$ 14.19        |
| Weight (kg)              | 62.93 $\pm$ 11.90        | 93.39 $\pm$ 14.14        |
| Height (cm)              | 1.66 $\pm$ 0.12          | 1.65 $\pm$ 0.09          |
| BMI (kg/m <sup>2</sup> ) | 22.82 $\pm$ 2.35         | 34.69 $\pm$ 3.64         |
| Waist (cm)               | 81.33 $\pm$ 12.44        | 106.74 $\pm$ 12.86       |
| Body fat (%)             | 28.37 $\pm$ 6.27         | 39.53 $\pm$ 3.95         |
| FBS (mmol/L)             | 4.97 $\pm$ 0.64          | 5.43 $\pm$ 0.81          |
| TGL (mmol/L)             | 0.63 $\pm$ 0.24          | 1.30 $\pm$ 0.92          |
| Chol (mmol/L)            | 5.3 $\pm$ 1.11           | 5.14 $\pm$ 1.21          |
| HDL (mmol/L)             | 1.69 $\pm$ 0.51          | 1.27 $\pm$ 0.31          |
| LDL (mmol/L)             | 3.31 $\pm$ 0.93          | 3.31 $\pm$ 0.98          |
| HbA1c (%)                | 5.66 $\pm$ 0.46          | 5.65 $\pm$ 0.74          |
| Insulin (mU/L)           | 6.58 $\pm$ 3.34          | 16.50 $\pm$ 12.42        |
| HOMA-IR                  | 1.40 $\pm$ 0.64          | 5.12 $\pm$ 4.46          |
| WBC                      | 5.57 $\pm$ 1.60          | 5.87 $\pm$ 1.66          |
